# Supplementary material for: A new, three-dimensional geometric morphometric approach to assess egg shape
Source: PeerJ journal article supplement (doi:10.7717/peerj.5052), 2018-06-27

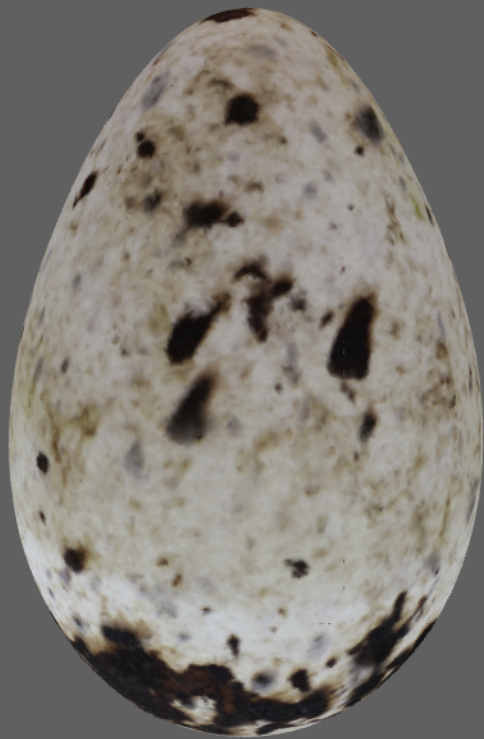

Supplement: Figure_S1.pdf [file Figure_S1.pdf]
